# Supplementary material
Source: PubMed Central journal article supplement (PMC3459071)
Supplement: NIHMS377157-supplement-Supp_Table_S1-S3.pdf [file NIHMS377157-supplement-Supp_Table_S1-S3.pdf]

**SUPPLEMENTAL TABLE 1.** Comparison of the number of indication biopsies and the histological appearance of these indication biopsies, according to whether a protocol biopsy was performed. P values were calculated using one-way ANOVA or Fisher exact test.

|                                                                                  | Protocol biopsy at 6 months  |               |         |
|----------------------------------------------------------------------------------|------------------------------|---------------|---------|
|                                                                                  | Done                         | Not done      | P value |
| <b>Number of indication biopsies (mean ± standard deviation)</b>                 | 1.09 ± 1.43                  | 0.83 ± 1.09   | 0.3659  |
| <b>At least one indication biopsy</b>                                            | 50/100 (50.0%)               | 14/30 (46.7%) | 0.8361  |
| <b>At least one indication biopsy with acute rejection</b>                       | 16/100 (16.0%)               | 6/30 (20.0%)  | 0.5883  |
| <b>At least one indication biopsy with acute rejection or borderline changes</b> | 26/100 (26.0%)               | 10/30 (33.3%) | 0.4874  |
|                                                                                  |                              |               |         |
|                                                                                  | Protocol biopsy at 12 months |               |         |
|                                                                                  | Done                         | Not done      | P value |
| <b>Number of indication biopsies (mean ± standard deviation)</b>                 | 0.96 ± 1.32                  | 1.14 ± 1.43   | 0.4663  |
| <b>At least one indication biopsy</b>                                            | 38/81 (46.9%)                | 26/49 (53.1%) | 0.5877  |
| <b>At least one indication biopsy with acute rejection</b>                       | 12/81 (14.8%)                | 10/49 (20.4%) | 0.4721  |
| <b>At least one indication biopsy with acute rejection or borderline changes</b> | 21/81 (25.9%)                | 15/49 (30.6%) | 0.6862  |
|                                                                                  |                              |               |         |
|                                                                                  | Protocol biopsy at 24 months |               |         |
|                                                                                  | Done                         | Not done      | P value |
| <b>Number of indication biopsies (mean ± standard deviation)</b>                 | 1.15 ± 1.55                  | 0.87 ± 1.04   | 0.2574  |
| <b>At least one indication biopsy</b>                                            | 36/75 (47.6%)                | 28/55 (50.9%) | 0.8592  |
| <b>At least one indication biopsy with acute rejection</b>                       | 11/75 (14.7%)                | 11/55 (20.0%) | 0.4816  |
| <b>At least one indication biopsy with acute rejection or borderline changes</b> | 20/75 (26.7%)                | 16/55 (29.1%) | 0.8434  |

**SUPPLEMENTAL TABLE 2. Histological characteristics (% prevalence) of the renal allograft protocol biopsies at implantation and at 6,12 and 24 months after transplantation.** Already in the first 2 years after transplantation, there was an increase in interstitial fibrosis and tubular atrophy, which was present in almost 50% of biopsies performed at 1 year after transplantation. In addition, there was a significant increase in the prevalence and extent of vascular intimal thickening by time after transplantation, mainly in the first 3 months after transplantation. The prevalence of tubular microcalcifications increased only in the first 3 months after transplantation. Also the prevalence of ischemic glomerular changes, glomerulosclerosis, lymphoid aggregates, CD20 positive infiltration and inflammation in atrophic areas increased in the first 2 years after transplantation. There was no significant increase in arteriolar hyalinosis, C4d deposition or transplant glomerulopathy. P-values were obtained using Cochran-Mantel-Haenszel statistics (non-zero correlation). \*The subclinical rejection evolution P-value was calculated with exclusion of implantation biopsies.

|                                                 |                   | <b>Implantation</b> | <b>6 months</b> | <b>12 months</b> | <b>24 months</b> | <b>P-value</b> |
|-------------------------------------------------|-------------------|---------------------|-----------------|------------------|------------------|----------------|
|                                                 | <b>N</b>          | 112                 | 100             | 81               | 75               |                |
| <b>Subclinical T-cell mediated rejection</b>    | <b>Absent</b>     | -                   | 80 (80%)        | 71 (78%)         | 68 (91%)         | 0.015*         |
|                                                 | <b>Borderline</b> | -                   | 9 (9%)          | 8 (9.9%)         | 5 (6.7%)         |                |
|                                                 | <b>Acute</b>      | -                   | 11 (11%)        | 2 (2.5%)         | 2 (2.7%)         |                |
| <b>Subclinical antibody-mediated rejection</b>  | <b>Absent</b>     | -                   | 85/86 (99%)     | 75/75 (100%)     | 72/72 (100%)     | 0.31           |
|                                                 | <b>Present</b>    | -                   | 1/86 (1.2%)     | 0/75 (0%)        | 0/72 (0%)        |                |
| <b>Interstitial fibrosis (Banff "ci" score)</b> | <b>0-5%</b>       | 110 (98%)           | 66 (66%)        | 40 (49%)         | 33 (44%)         | <0.0001        |
|                                                 | <b>6-25%</b>      | 2 (1.8%)            | 25 (25%)        | 29 (36%)         | 23 (31%)         |                |
|                                                 | <b>26-50%</b>     | 0 (0%)              | 6 (6%)          | 7 (8.6%)         | 10 (13%)         |                |
|                                                 | <b>&gt;50%</b>    | 0 (0%)              | 3 (3%)          | 5 (6.2%)         | 9 (12%)          |                |
| <b>Tubular atrophy (Banff "ct" score)</b>       | <b>0%</b>         | 90 (80.4%)          | 32 (32%)        | 18 (22%)         | 23 (31%)         | <0.0001        |
|                                                 | <b>1-25%</b>      | 22 (20%)            | 61 (61%)        | 52 (64%)         | 34 (45%)         |                |
|                                                 | <b>26-50%</b>     | 0 (0%)              | 4 (4%)          | 7 (8.6%)         | 8 (11%)          |                |

|                                                            |                                               |              |             |             |             |         |
|------------------------------------------------------------|-----------------------------------------------|--------------|-------------|-------------|-------------|---------|
|                                                            | <b>&gt;50%</b>                                | 0 (0%)       | 3 (3%)      | 4 (4.9%)    | 10 (13%)    |         |
| <b>Banff "IFTA" grade</b>                                  | <b>grade 0</b>                                | 110 (98%)    | 67 (67%)    | 40 (49%)    | 33 (44%)    | <0.0001 |
|                                                            | <b>grade 1</b>                                | 2 (1.8%)     | 26 (26%)    | 30 (37%)    | 24 (32%)    |         |
|                                                            | <b>grade 2</b>                                | 0 (0%)       | 4 (4%)      | 7 (8.6%)    | 9 (12%)     |         |
|                                                            | <b>grade 3</b>                                | 0 (0%)       | 3 (3%)      | 4 (4.9%)    | 9 (12%)     |         |
| <b>Percentage globally sclerosed glomeruli</b>             | <b>Absent</b>                                 | 83/112 (74%) | 75/96 (78%) | 55/78 (71%) | 39/74 (53%) | <0.0001 |
|                                                            | <b>1-25%</b>                                  | 29/112 (26%) | 21/96 (22%) | 20/78 (26%) | 25/74 (34%) |         |
|                                                            | <b>&gt; 25%</b>                               | 0/112 (0%)   | 0/96 (0%)   | 3/78 (3.9%) | 10/74 (24%) |         |
| <b>Vascular intimal thickening (Banff "cv" score)</b>      | <b>Absent</b>                                 | 108 (96%)    | 77 (77%)    | 66 (81%)    | 59 (79%)    | 0.0098  |
|                                                            | <b>Present with &lt;25% luminal narrowing</b> | 4 (3.6%)     | 14 (14%)    | 10 (12%)    | 13 (17%)    |         |
|                                                            | <b>Present with 25-50% luminal narrowing</b>  | 0 (0%)       | 7 (7%)      | 4 (4.9%)    | 3 (4%)      |         |
|                                                            | <b>Present with &gt;50% luminal narrowing</b> | 0 (0%)       | 2 (2%)      | 1 (1.2%)    | 0 (0%)      |         |
| <b>Mesangial matrix increase (Banff "mm" score)</b>        | <b>Absent</b>                                 | 112 (100%)   | 99 (99%)    | 81 (100%)   | 71 (95%)    | 0.0098  |
|                                                            | <b>Present</b>                                | 0 (0%)       | 1 (1%)      | 0 (0%)      | 4 (5.3%)    |         |
| <b>Tubular microcalcifications</b>                         | <b>Absent</b>                                 | 110 (98%)    | 85 (85%)    | 65 (80%)    | 59 (79%)    | <0.0001 |
|                                                            | <b>Present</b>                                | 2 (1.8%)     | 15 (15%)    | 16 (20%)    | 16 (21%)    |         |
| <b>Peripheral arteriolar hyalinosis (Banff "ah" score)</b> | <b>Absent</b>                                 | 107 (96%)    | 92 (92%)    | 75 (93%)    | 70 (93%)    | 0.39    |
|                                                            | <b>Present</b>                                | 4 (3.6%)     | 8 (8%)      | 6 (7.4%)    | 5 (6.7%)    |         |

|                                                                    |                |                |             |              |              |         |
|--------------------------------------------------------------------|----------------|----------------|-------------|--------------|--------------|---------|
| <b>Ischemic glomerular changes</b>                                 | <b>Absent</b>  | 100 (89%)      | 78 (78%)    | 43 (53%)     | 30 (40%)     | <0.0001 |
|                                                                    | <b>Present</b> | 12 (11%)       | 22 (22%)    | 38 (47%)     | 45 (60%)     |         |
| <b>Diffuse C4d deposition in peritubular capillaries (&gt;50%)</b> | <b>Absent</b>  | 104/104 (100%) | 85/86 (99%) | 75/75 (100%) | 72/72 (100%) | 0.82    |
|                                                                    | <b>Present</b> | 0 (0%)         | 1/86 (1%)   | 0/75 (0%)    | 0/73 (0%)    |         |
| <b>Glomerulitis (Banff "g" score)</b>                              | <b>Absent</b>  | 112 (100%)     | 1 (1.0%)    | 1 (1.2%)     | 3 (4.0%)     | 0.0217  |
|                                                                    | <b>Present</b> | 0 (0%)         | 99 (99%)    | 80 (98.8%)   | 72 (96%)     |         |
| <b>Peritubular capillaritis</b>                                    | <b>Absent</b>  | 112 (100%)     | 95 (95%)    | 83 (100%)    | 68 (91%)     | 0.008   |
|                                                                    | <b>Present</b> | 0 (0%)         | 5 (5%)      | 0 (0%)       | 7 (9.3%)     |         |
| <b>Transplant glomerulopathy (Banff "cg" score)</b>                | <b>Absent</b>  | 112 (100%)     | 99 (99%)    | 80 (99%)     | 73 (97%)     | 0.09    |
|                                                                    | <b>Present</b> | 0 (0%)         | 1 (1%)      | 1 (1.2%)     | 2 (2.7%)     |         |
| <b>CD20 positive infiltrates</b>                                   | <b>Absent</b>  | 99/99 (100%)   | 75/83 (90%) | 65/75 (87%)  | 53/72 (74%)  | <0.0001 |
|                                                                    | <b>Present</b> | 0 (0%)         | 8/83 (9.6%) | 10/75 (13%)  | 19/72 (26%)  |         |
| <b>Inflammation in atrophic areas</b>                              | <b>0</b>       | 108 (96%)      | 58 (58%)    | 32 (40%)     | 28 (37.3%)   | <0.0001 |
|                                                                    | <b>1</b>       | 4 (3.6%)       | 32 (32%)    | 32 (40%)     | 22 (29%)     |         |
|                                                                    | <b>2</b>       | 0 (0%)         | 6 (6%)      | 10 (13%)     | 8 (11%)      |         |
|                                                                    | <b>3</b>       | 0 (0%)         | 4 (4%)      | 7 (8.8%)     | 17 (23%)     |         |
| <b>Lymphoid aggregates</b>                                         | <b>Absent</b>  | 112 (100%)     | 74 (74%)    | 51 (63%)     | 44 (59%)     | <0.0001 |
|                                                                    | <b>Present</b> | 0 (0%)         | 26 (26%)    | 30 (37%)     | 31 (41%)     |         |

|                    |              |          |          |          |          |         |
|--------------------|--------------|----------|----------|----------|----------|---------|
| <b>CADI score</b>  | <b>0-1</b>   | 96 (86%) | 45 (45%) | 30 (37%) | 26 (35%) | <0.0001 |
|                    | <b>2-4</b>   | 16 (14%) | 43 (43%) | 40 (49%) | 31 (41%) |         |
|                    | <b>5-7</b>   | 0 (0%)   | 12 (12%) | 11 (14%) | 13 (17%) |         |
|                    | <b>&gt;7</b> | 0 (0%)   | 0 (0%)   | 0 (0%)   | 5 (6.7%) |         |
| <b>cCNIT score</b> | <b>0-1</b>   | 98 (88%) | 53 (53%) | 33 (41%) | 29 (39%) | <0.0001 |
|                    | <b>2-4</b>   | 14 (13%) | 39 (39%) | 40 (49%) | 28 (37%) |         |
|                    | <b>5-7</b>   | 0 (0%)   | 8 (8%)   | 8 (9.9%) | 16 (21%) |         |
|                    | <b>&gt;7</b> | 0 (0%)   | 0 (0%)   | 0 (0%)   | 2 (2.7%) |         |

**SUPPLEMENTAL TABLE 3**

\*Analyses were performed using the GENMOD procedure with generalized-estimating-equations (GEE).

|                        |                                     | <b>Determinants of higher grade of interstitial fibrosis/tubular atrophy*</b> |                           |                                                        |                                                                    |
|------------------------|-------------------------------------|-------------------------------------------------------------------------------|---------------------------|--------------------------------------------------------|--------------------------------------------------------------------|
|                        |                                     | <b>Univariate odds ratio</b>                                                  | <b>Univariate p-value</b> | <b>Multivariate p-value after backward elimination</b> | <b>Multivariate adjusted odds ratio after backward elimination</b> |
| <b>Treatment group</b> |                                     |                                                                               |                           |                                                        |                                                                    |
|                        | <b>Steroid-based</b>                | 1                                                                             |                           |                                                        |                                                                    |
|                        | <b>Steroid-free</b>                 | 1.14 (0.71-1.83)                                                              | 0.5967                    |                                                        |                                                                    |
| <b>Recipient sex</b>   |                                     |                                                                               |                           |                                                        |                                                                    |
|                        | <b>Female</b>                       | 1                                                                             |                           |                                                        |                                                                    |
|                        | <b>Male</b>                         | 1.44 (0.88-2.38)                                                              | 0.1499                    |                                                        |                                                                    |
| <b>Donor sex</b>       |                                     |                                                                               |                           |                                                        |                                                                    |
|                        | <b>Female</b>                       | 1                                                                             |                           |                                                        |                                                                    |
|                        | <b>Male</b>                         | 0.99 (0.61-1.60)                                                              | 0.9667                    |                                                        |                                                                    |
| <b>Recipient age</b>   |                                     |                                                                               |                           |                                                        |                                                                    |
|                        | <b>&lt; 5 years</b>                 | 2.30 (1.44-3.69)                                                              | 0.0005                    |                                                        |                                                                    |
|                        | <b>5 - 12 years</b>                 | 1.44 (0.80-2.59)                                                              | 0.2183                    |                                                        |                                                                    |
|                        | <b>&gt; 12 years</b>                | 1                                                                             |                           |                                                        |                                                                    |
| <b>Donor source</b>    |                                     |                                                                               |                           |                                                        |                                                                    |
|                        | <b>Living</b>                       | 1                                                                             |                           |                                                        |                                                                    |
|                        | <b>Deceased</b>                     | 0.73 (0.45-1.18)                                                              | 0.1999                    |                                                        |                                                                    |
| <b>Recipient size</b>  |                                     |                                                                               |                           |                                                        |                                                                    |
|                        | <b>BSA &lt; 0.75 m<sup>2</sup></b>  | 3.42 (1.77-6.64)                                                              | 0.0003                    | 4.52 (2.02-10.1)                                       | 0.0002                                                             |
|                        | <b>BSA 0.75 - 1.5 m<sup>2</sup></b> | 1.99 (1.02-3.89)                                                              | 0.0436                    | 2.22 (0.99-4.95)                                       | 0.0516                                                             |

|                                        |                                   |                  |         |                 |         |
|----------------------------------------|-----------------------------------|------------------|---------|-----------------|---------|
|                                        | <b>BSA &gt; 1.5 m<sup>2</sup></b> | 1                |         | 1               |         |
| <b>Time after transplantation</b>      |                                   |                  |         |                 |         |
|                                        | <b>Implantation</b>               | 1                |         | 1               |         |
|                                        | <b>6 months</b>                   | 26.7 (6.4-111)   | <0.0001 | 29.1 (6.89-123) | <0.0001 |
|                                        | <b>12 months</b>                  | 54.0 (12.5-233)  | <0.0001 | 60.0 (13.6-264) | <0.0001 |
|                                        | <b>24 months</b>                  | 78.5 (19.1-323)  | <0.0001 | 87.5 (21.0-364) | <0.0001 |
| <b>Prior acute rejection episode</b>   |                                   |                  |         |                 |         |
|                                        | <b>No</b>                         | 1                |         |                 |         |
|                                        | <b>Prior AR</b>                   | 2.25 (1.24-4.11) | 0.0079  |                 |         |
| <b>Pristine kidney at implantation</b> |                                   |                  |         |                 |         |
|                                        | <b>Yes</b>                        | 1                |         |                 |         |
|                                        | <b>No</b>                         | 1.21 (0.75-1.95) | 0.4296  |                 |         |
| <b>Donor age</b>                       |                                   |                  |         |                 |         |
|                                        | <b>&lt; 25 years</b>              | 1                |         |                 |         |
|                                        | <b>25 - 35 years</b>              | 1.50 (0.87-2.60) | 0.1464  |                 |         |
|                                        | <b>&gt; 35 years</b>              | 1.63 (0.90-2.96) | 0.1061  |                 |         |

\*Analyses were performed using the GENMOD procedure with generalized-estimating-equations (GEE).

|                                   |                                     | Determinants of higher grade of cCNIT score* |                    |                                                 |                                                             |
|-----------------------------------|-------------------------------------|----------------------------------------------|--------------------|-------------------------------------------------|-------------------------------------------------------------|
|                                   |                                     | Univariate odds ratio                        | Univariate p-value | Multivariate p-value after backward elimination | Multivariate adjusted odds ratio after backward elimination |
| <b>Treatment group</b>            |                                     |                                              |                    |                                                 |                                                             |
|                                   | <b>Steroid-based</b>                | 1                                            |                    |                                                 |                                                             |
|                                   | <b>Steroid-free</b>                 | 1.11 (0.70-1.75)                             | 0.6571             |                                                 |                                                             |
| <b>Recipient sex</b>              |                                     |                                              |                    |                                                 |                                                             |
|                                   | <b>Female</b>                       | 1                                            |                    |                                                 |                                                             |
|                                   | <b>Male</b>                         | 1.23 (0.78-1.94)                             | 0.3686             |                                                 |                                                             |
| <b>Donor sex</b>                  |                                     |                                              |                    |                                                 |                                                             |
|                                   | <b>Female</b>                       | 1                                            |                    |                                                 |                                                             |
|                                   | <b>Male</b>                         | 0.83 (0.53-1.31)                             | 0.4308             |                                                 |                                                             |
| <b>Recipient age</b>              |                                     |                                              |                    |                                                 |                                                             |
|                                   | <b>&lt; 5 years</b>                 | 2.06 (1.35-3.15)                             | 0.0008             |                                                 |                                                             |
|                                   | <b>5 - 12 years</b>                 | 1.28 (0.71-2.28)                             | 0.4097             |                                                 |                                                             |
|                                   | <b>&gt; 12 years</b>                | 1                                            |                    |                                                 |                                                             |
| <b>Donor source</b>               |                                     |                                              |                    |                                                 |                                                             |
|                                   | <b>Living</b>                       | 1                                            |                    |                                                 |                                                             |
|                                   | <b>Deceased</b>                     | 0.59 (0.38-0.92)                             | 0.0203             |                                                 |                                                             |
| <b>Recipient size</b>             |                                     |                                              |                    |                                                 |                                                             |
|                                   | <b>BSA &lt; 0.75 m<sup>2</sup></b>  | 2.59 (1.45-4.63)                             | 0.0014             | 3.82 (1.86-7.81)                                | 0.0002                                                      |
|                                   | <b>BSA 0.75 - 1.5 m<sup>2</sup></b> | 1.57 (0.88-2.82)                             | 0.1262             | 2.01 (1.00-4.02)                                | 0.0485                                                      |
|                                   | <b>BSA &gt; 1.5 m<sup>2</sup></b>   | 1                                            |                    | 1                                               |                                                             |
| <b>Time after transplantation</b> |                                     |                                              |                    |                                                 |                                                             |
|                                   | <b>Implantation</b>                 | 1                                            |                    | 1                                               |                                                             |
|                                   | <b>6 months</b>                     | 5.28 (2.84-9.82)                             | <0.0001            | 5.86 (3.09-11.1)                                | <0.0001                                                     |



|                                        |                      |                  |         |                  |         |
|----------------------------------------|----------------------|------------------|---------|------------------|---------|
|                                        | <b>12 months</b>     | 9.48 (4.69-19.2) | <0.0001 | 10.7 (5.14-22.3) | <0.0001 |
|                                        | <b>24 months</b>     | 14.1 (7.12-27.9) | <0.0001 | 16.5 (8.17-33.4) | <0.0001 |
| <b>Prior acute rejection episode</b>   |                      |                  |         |                  |         |
|                                        | <b>No</b>            | 1                |         |                  |         |
|                                        | <b>Prior AR</b>      | 1.83 (1.04-3.23) | 0.0364  |                  |         |
| <b>Pristine kidney at implantation</b> |                      |                  |         |                  |         |
|                                        | <b>Yes</b>           | 1                |         |                  |         |
|                                        | <b>No</b>            | 1.61 (1.02-2.54) | 0.0423  |                  |         |
| <b>Donor age</b>                       |                      |                  |         |                  |         |
|                                        | <b>&lt; 25 years</b> | 1                |         | 1                |         |
|                                        | <b>25 - 35 years</b> | 1.87 (1.09-3.20) | 0.0232  | 2.24 (1.17-4.28) | 0.0149  |
|                                        | <b>&gt; 35 years</b> | 2.46 (1.41-4.27) | 0.0014  | 3.41 (1.81-6.40) | 0.0001  |

\*Analyses were performed using the GENMOD procedure with generalized-estimating-equations (GEE).

|                                   |                                     | <b>Determinants of vascular intimal thickening*</b> |                           |                                                        |                                                                    |
|-----------------------------------|-------------------------------------|-----------------------------------------------------|---------------------------|--------------------------------------------------------|--------------------------------------------------------------------|
|                                   |                                     | <b>Univariate odds ratio</b>                        | <b>Univariate p-value</b> | <b>Multivariate p-value after backward elimination</b> | <b>Multivariate adjusted odds ratio after backward elimination</b> |
| <b>Treatment group</b>            |                                     |                                                     |                           |                                                        |                                                                    |
|                                   | <b>Steroid-based</b>                | 1                                                   |                           |                                                        |                                                                    |
|                                   | <b>Steroid-free</b>                 | 0.70 (0.38-1.28)                                    | 0.2405                    |                                                        |                                                                    |
| <b>Recipient sex</b>              |                                     |                                                     |                           |                                                        |                                                                    |
|                                   | <b>Female</b>                       | 1                                                   |                           |                                                        |                                                                    |
|                                   | <b>Male</b>                         | 1.37 (0.69-2.71)                                    | 0.3622                    |                                                        |                                                                    |
| <b>Donor sex</b>                  |                                     |                                                     |                           |                                                        |                                                                    |
|                                   | <b>Female</b>                       | 1                                                   |                           |                                                        |                                                                    |
|                                   | <b>Male</b>                         | 1.36 (0.75-2.47)                                    | 0.3134                    |                                                        |                                                                    |
| <b>Recipient age</b>              |                                     |                                                     |                           |                                                        |                                                                    |
|                                   | <b>&lt; 5 years</b>                 | 2.28 (1.16-4.52)                                    | 0.0176                    |                                                        |                                                                    |
|                                   | <b>5 - 12 years</b>                 | 0.90 (0.40-2.01)                                    | 0.7961                    |                                                        |                                                                    |
|                                   | <b>&gt; 12 years</b>                | 1                                                   |                           |                                                        |                                                                    |
| <b>Donor source</b>               |                                     |                                                     |                           |                                                        |                                                                    |
|                                   | <b>Living</b>                       | 1                                                   |                           |                                                        |                                                                    |
|                                   | <b>Deceased</b>                     | 0.40 (0.22-0.75)                                    | 0.0044                    |                                                        |                                                                    |
| <b>Recipient size</b>             |                                     |                                                     |                           |                                                        |                                                                    |
|                                   | <b>BSA &lt; 0.75 m<sup>2</sup></b>  | 2.04 (0.89-4.68)                                    | 0.0939                    |                                                        |                                                                    |
|                                   | <b>BSA 0.75 - 1.5 m<sup>2</sup></b> | 0.90 (0.42-1.94)                                    | 0.7903                    |                                                        |                                                                    |
|                                   | <b>BSA &gt; 1.5 m<sup>2</sup></b>   | 1                                                   |                           |                                                        |                                                                    |
| <b>Time after transplantation</b> |                                     |                                                     |                           |                                                        |                                                                    |
|                                   | <b>Implantation</b>                 | 1                                                   |                           | 1                                                      |                                                                    |
|                                   | <b>6 months</b>                     | 8.06 (2.74-23.8)                                    | 0.0002                    | 8.33 (2.76-25.2)                                       | 0.0002                                                             |

|                                        |                      |                  |        |                  |        |
|----------------------------------------|----------------------|------------------|--------|------------------|--------|
|                                        | <b>12 months</b>     | 6.14 (2.03-18.6) | 0.0013 | 6.26 (2.03-19.3) | 0.0014 |
|                                        | <b>24 months</b>     | 7.32 (2.44-22.0) | 0.0004 | 7.41 (2.41-22.8) | 0.0005 |
| <b>Prior acute rejection episode</b>   |                      |                  |        |                  |        |
|                                        | <b>No</b>            | 1                |        |                  |        |
|                                        | <b>Prior AR</b>      | 2.97 (1.54-5.74) | 0.0012 |                  |        |
| <b>Pristine kidney at implantation</b> |                      |                  |        |                  |        |
|                                        | <b>Yes</b>           | 1                |        |                  |        |
|                                        | <b>No</b>            | 2.77 (1.52-5.08) | 0.0009 |                  |        |
| <b>Donor age</b>                       |                      |                  |        |                  |        |
|                                        | <b>&lt; 25 years</b> | 1                |        | 1                |        |
|                                        | <b>25 - 35 years</b> | 2.44 (1.06-5.63) | 0.0367 | 2.50 (1.05-5.93) | 0.0383 |
|                                        | <b>&gt; 35 years</b> | 3.07 (1.27-7.41) | 0.0125 | 3.18 (1.27-7.99) | 0.0136 |

\*Analyses were performed using the GENMOD procedure with generalized-estimating-equations (GEE).

|                                   |                                     | Determinants of arteriolar hyalinosis* |                    |                                                 |                                                             |
|-----------------------------------|-------------------------------------|----------------------------------------|--------------------|-------------------------------------------------|-------------------------------------------------------------|
|                                   |                                     | Univariate odds ratio                  | Univariate p-value | Multivariate p-value after backward elimination | Multivariate adjusted odds ratio after backward elimination |
| <b>Treatment group</b>            |                                     |                                        |                    |                                                 |                                                             |
|                                   | <b>Steroid-based</b>                | 1                                      |                    |                                                 |                                                             |
|                                   | <b>Steroid-free</b>                 | 1.94 (0.82-4.61)                       | 0.1326             |                                                 |                                                             |
| <b>Recipient sex</b>              |                                     |                                        |                    |                                                 |                                                             |
|                                   | <b>Female</b>                       | 1                                      |                    |                                                 |                                                             |
|                                   | <b>Male</b>                         | 0.61 (0.25-1.46)                       | 0.2652             |                                                 |                                                             |
| <b>Donor sex</b>                  |                                     |                                        |                    |                                                 |                                                             |
|                                   | <b>Female</b>                       | 1                                      |                    |                                                 |                                                             |
|                                   | <b>Male</b>                         | 1.75 (0.71-4.31)                       | 0.2258             |                                                 |                                                             |
| <b>Recipient age</b>              |                                     |                                        |                    |                                                 |                                                             |
|                                   | <b>&lt; 5 years</b>                 | 1.19 (0.41-3.45)                       | 0.7423             |                                                 |                                                             |
|                                   | <b>5 - 12 years</b>                 | 0.42 (0.12-1.44)                       | 0.1668             |                                                 |                                                             |
|                                   | <b>&gt; 12 years</b>                | 1                                      |                    |                                                 |                                                             |
| <b>Donor source</b>               |                                     |                                        |                    |                                                 |                                                             |
|                                   | <b>Living</b>                       | 1                                      |                    |                                                 |                                                             |
|                                   | <b>Deceased</b>                     | 0.44 (0.18-1.07)                       | 0.07               |                                                 |                                                             |
| <b>Recipient size</b>             |                                     |                                        |                    |                                                 |                                                             |
|                                   | <b>BSA &lt; 0.75 m<sup>2</sup></b>  | 0.76 (0.21-2.80)                       | 0.683              |                                                 |                                                             |
|                                   | <b>BSA 0.75 - 1.5 m<sup>2</sup></b> | 1.08 (0.41-2.81)                       | 0.8795             |                                                 |                                                             |
|                                   | <b>BSA &gt; 1.5 m<sup>2</sup></b>   | 1                                      |                    |                                                 |                                                             |
| <b>Time after transplantation</b> |                                     |                                        |                    |                                                 |                                                             |
|                                   | <b>Implantation</b>                 | 1                                      |                    | 1                                               |                                                             |
|                                   | <b>6 months</b>                     | 2.33 (0.73-7.38)                       | 0.1521             | 2.47 (0.74-8.20)                                | 0.1409                                                      |

|                                        |                      |                  |        |                  |        |
|----------------------------------------|----------------------|------------------|--------|------------------|--------|
|                                        | <b>12 months</b>     | 2.14 (0.56-8.16) | 0.2651 | 2.18 (0.54-8.80) | 0.2737 |
|                                        | <b>24 months</b>     | 1.91 (0.56-6.47) | 0.2979 | 1.84 (0.51-6.68) | 0.3552 |
| <b>Prior acute rejection episode</b>   |                      |                  |        |                  |        |
|                                        | <b>No</b>            | 1                |        |                  |        |
|                                        | <b>Prior AR</b>      | 1.60 (0.46-5.60) | 0.4622 |                  |        |
| <b>Pristine kidney at implantation</b> |                      |                  |        |                  |        |
|                                        | <b>Yes</b>           | 1                |        |                  |        |
|                                        | <b>No</b>            | 1.66 (0.70-3.95) | 0.2501 |                  |        |
| <b>Donor age</b>                       |                      |                  |        |                  |        |
|                                        | <b>&lt; 25 years</b> | 1                |        | 1                |        |
|                                        | <b>25 - 35 years</b> | 1.59 (0.37-6.87) | 0.5356 | 1.58 (0.36-6.87) | 0.5415 |
|                                        | <b>&gt; 35 years</b> | 7.94 (2.32-27.1) | 0.0009 | 8.04 (2.33-27.7) | 0.001  |

\*Analyses were performed using the GENMOD procedure with generalized-estimating-equations (GEE).

|                                   |                                     | Determinants of ischemic glomeruli* |                    |                                                 |                                                             |
|-----------------------------------|-------------------------------------|-------------------------------------|--------------------|-------------------------------------------------|-------------------------------------------------------------|
|                                   |                                     | Univariate odds ratio               | Univariate p-value | Multivariate p-value after backward elimination | Multivariate adjusted odds ratio after backward elimination |
| <b>Treatment group</b>            |                                     |                                     |                    |                                                 |                                                             |
|                                   | <b>Steroid-based</b>                | 1                                   |                    |                                                 |                                                             |
|                                   | <b>Steroid-free</b>                 | 1.22 (0.77-1.93)                    | 0.3994             |                                                 |                                                             |
| <b>Recipient sex</b>              |                                     |                                     |                    |                                                 |                                                             |
|                                   | <b>Female</b>                       | 1                                   |                    |                                                 |                                                             |
|                                   | <b>Male</b>                         | 1.50 (0.95-2.36)                    | 0.0792             |                                                 |                                                             |
| <b>Donor sex</b>                  |                                     |                                     |                    |                                                 |                                                             |
|                                   | <b>Female</b>                       | 1                                   |                    |                                                 |                                                             |
|                                   | <b>Male</b>                         | 0.98 (0.62-1.55)                    | 0.9302             |                                                 |                                                             |
| <b>Recipient age</b>              |                                     |                                     |                    |                                                 |                                                             |
|                                   | <b>&lt; 5 years</b>                 | 1.87 (1.13-3.09)                    | 0.0147             |                                                 |                                                             |
|                                   | <b>5 - 12 years</b>                 | 1.29 (0.75-2.20)                    | 0.3528             |                                                 |                                                             |
|                                   | <b>&gt; 12 years</b>                | 1                                   |                    |                                                 |                                                             |
| <b>Donor source</b>               |                                     |                                     |                    |                                                 |                                                             |
|                                   | <b>Living</b>                       | 1                                   |                    |                                                 |                                                             |
|                                   | <b>Deceased</b>                     | 0.59 (0.37-0.93)                    | 0.0245             |                                                 |                                                             |
| <b>Recipient size</b>             |                                     |                                     |                    |                                                 |                                                             |
|                                   | <b>BSA &lt; 0.75 m<sup>2</sup></b>  | 2.17 (1.15-4.08)                    | 0.0168             | 2.87 (1.34-6.13)                                | 0.0066                                                      |
|                                   | <b>BSA 0.75 - 1.5 m<sup>2</sup></b> | 1.41 (0.76-2.60)                    | 0.2793             | 1.65 (0.79-3.45)                                | 0.1851                                                      |
|                                   | <b>BSA &gt; 1.5 m<sup>2</sup></b>   | 1                                   |                    | 1                                               |                                                             |
| <b>Time after transplantation</b> |                                     |                                     |                    |                                                 |                                                             |
|                                   | <b>Implantation</b>                 | 1                                   |                    | 1                                               |                                                             |
|                                   | <b>6 months</b>                     | 2.35 (1.14-4.86)                    | 0.0212             | 2.25 (1.05-4.82)                                | 0.0377                                                      |

|                                        |                      |                  |         |                  |         |
|----------------------------------------|----------------------|------------------|---------|------------------|---------|
|                                        | <b>12 months</b>     | 7.36 (3.64-14.9) | <0.0001 | 7.25 (3.45-15.3) | <0.0001 |
|                                        | <b>24 months</b>     | 12.5 (5.77-27.1) | <0.0001 | 13.2 (5.86-29.5) | <0.0001 |
| <b>Prior acute rejection episode</b>   |                      |                  |         |                  |         |
|                                        | <b>No</b>            | 1                |         |                  |         |
|                                        | <b>Prior AR</b>      | 1.95 (1.07-3.54) | 0.0283  |                  |         |
| <b>Pristine kidney at implantation</b> |                      |                  |         |                  |         |
|                                        | <b>Yes</b>           | 1                |         | 1                |         |
|                                        | <b>No</b>            | 1.82 (1.16-2.88) | 0.0099  | 1.87 (1.09-3.21) | 0.0229  |
| <b>Donor age</b>                       |                      |                  |         |                  |         |
|                                        | <b>&lt; 25 years</b> | 1                |         |                  |         |
|                                        | <b>25 - 35 years</b> | 1.37 (0.81-2.31) | 0.2408  |                  |         |
|                                        | <b>&gt; 35 years</b> | 1.93 (1.08-3.46) | 0.0274  |                  |         |

\*Analyses were performed using the GENMOD procedure with generalized-estimating-equations (GEE).

|                                   |                                     | <b>Determinants of tubular microcalcifications*</b> |                           |                                                        |                                                                    |
|-----------------------------------|-------------------------------------|-----------------------------------------------------|---------------------------|--------------------------------------------------------|--------------------------------------------------------------------|
|                                   |                                     | <b>Univariate odds ratio</b>                        | <b>Univariate p-value</b> | <b>Multivariate p-value after backward elimination</b> | <b>Multivariate adjusted odds ratio after backward elimination</b> |
| <b>Treatment group</b>            |                                     |                                                     |                           |                                                        |                                                                    |
|                                   | <b>Steroid-based</b>                | 1                                                   |                           |                                                        |                                                                    |
|                                   | <b>Steroid-free</b>                 | 0.98 (0.49-1.96)                                    | 0.9495                    |                                                        |                                                                    |
| <b>Recipient sex</b>              |                                     |                                                     |                           |                                                        |                                                                    |
|                                   | <b>Female</b>                       | 1                                                   |                           |                                                        |                                                                    |
|                                   | <b>Male</b>                         | 0.82 (0.41-1.65)                                    | 0.5818                    |                                                        |                                                                    |
| <b>Donor sex</b>                  |                                     |                                                     |                           |                                                        |                                                                    |
|                                   | <b>Female</b>                       | 1                                                   |                           |                                                        |                                                                    |
|                                   | <b>Male</b>                         | 1.45 (0.71-2.97)                                    | 0.305                     |                                                        |                                                                    |
| <b>Recipient age</b>              |                                     |                                                     |                           |                                                        |                                                                    |
|                                   | <b>&lt; 5 years</b>                 | 1.85 (0.81-4.19)                                    | 0.1426                    |                                                        |                                                                    |
|                                   | <b>5 - 12 years</b>                 | 1.08 (0.47-2.46)                                    | 0.8543                    |                                                        |                                                                    |
|                                   | <b>&gt; 12 years</b>                | 1                                                   |                           |                                                        |                                                                    |
| <b>Donor source</b>               |                                     |                                                     |                           |                                                        |                                                                    |
|                                   | <b>Living</b>                       | 1                                                   |                           |                                                        |                                                                    |
|                                   | <b>Deceased</b>                     | 1.93 (0.91-4.11)                                    | 0.0876                    |                                                        |                                                                    |
| <b>Recipient size</b>             |                                     |                                                     |                           |                                                        |                                                                    |
|                                   | <b>BSA &lt; 0.75 m<sup>2</sup></b>  | 2.32 (0.79-6.82)                                    | 0.1262                    |                                                        |                                                                    |
|                                   | <b>BSA 0.75 - 1.5 m<sup>2</sup></b> | 1.49 (0.58-3.78)                                    | 0.4049                    |                                                        |                                                                    |
|                                   | <b>BSA &gt; 1.5 m<sup>2</sup></b>   | 1                                                   |                           |                                                        |                                                                    |
| <b>Time after transplantation</b> |                                     |                                                     |                           |                                                        |                                                                    |
|                                   | <b>Implantation</b>                 | 1                                                   |                           | 1                                                      |                                                                    |
|                                   | <b>6 months</b>                     | 9.71 (2.32-40.7)                                    | 0.0019                    | 8.65 (1.96-38.1)                                       | 0.0043                                                             |



|                                        |                      |                  |        |                  |        |
|----------------------------------------|----------------------|------------------|--------|------------------|--------|
|                                        | <b>12 months</b>     | 13.5 (2.96-61.9) | 0.0008 | 13.1 (2.65-64.8) | 0.0016 |
|                                        | <b>24 months</b>     | 14.9 (3.23-68.8) | 0.0005 | 13.0 (2.67-63.6) | 0.0015 |
| <b>Prior acute rejection episode</b>   |                      |                  |        |                  |        |
|                                        | <b>No</b>            | 1                |        | 1                |        |
|                                        | <b>Prior AR</b>      | 3.85 (1.63-9.11) | 0.0021 | 3.28 (1.42-7.60) | 0.0054 |
| <b>Pristine kidney at implantation</b> |                      |                  |        |                  |        |
|                                        | <b>Yes</b>           | 1                |        |                  |        |
|                                        | <b>No</b>            | 0.50 (0.26-0.99) | 0.0452 | 0.34 (0.16-0.75) | 0.0076 |
| <b>Donor age</b>                       |                      |                  |        |                  |        |
|                                        | <b>&lt; 25 years</b> | 1                |        |                  |        |
|                                        | <b>25 - 35 years</b> | 0.97 (0.46-2.06) | 0.9467 |                  |        |
|                                        | <b>&gt; 35 years</b> | 0.36 (0.15-0.87) | 0.0237 |                  |        |

\*Analyses were performed using the GENMOD procedure with generalized-estimating-equations (GEE).

|                                   |                                     | Determinants of higher glomerulosclerosis group* |                    |                                                 |                                                             |
|-----------------------------------|-------------------------------------|--------------------------------------------------|--------------------|-------------------------------------------------|-------------------------------------------------------------|
|                                   |                                     | Univariate odds ratio                            | Univariate p-value | Multivariate p-value after backward elimination | Multivariate adjusted odds ratio after backward elimination |
| <b>Treatment group</b>            |                                     |                                                  |                    |                                                 |                                                             |
|                                   | <b>Steroid-based</b>                | 1                                                |                    |                                                 |                                                             |
|                                   | <b>Steroid-free</b>                 | 0.86 (0.51-1.46)                                 | 0.5829             |                                                 |                                                             |
| <b>Recipient sex</b>              |                                     |                                                  |                    |                                                 |                                                             |
|                                   | <b>Female</b>                       | 1                                                |                    |                                                 |                                                             |
|                                   | <b>Male</b>                         | 0.96 (0.57-1.60)                                 | 0.8659             |                                                 |                                                             |
| <b>Donor sex</b>                  |                                     |                                                  |                    |                                                 |                                                             |
|                                   | <b>Female</b>                       | 1                                                |                    |                                                 |                                                             |
|                                   | <b>Male</b>                         | 0.74 (0.45-1.22)                                 | 0.239              |                                                 |                                                             |
| <b>Recipient age</b>              |                                     |                                                  |                    |                                                 |                                                             |
|                                   | <b>&lt; 5 years</b>                 | 1.75 (1.00-3.09)                                 | 0.0516             |                                                 |                                                             |
|                                   | <b>5 - 12 years</b>                 | 1.52 (0.80-2.88)                                 | 0.1967             |                                                 |                                                             |
|                                   | <b>&gt; 12 years</b>                | 1                                                |                    |                                                 |                                                             |
| <b>Donor source</b>               |                                     |                                                  |                    |                                                 |                                                             |
|                                   | <b>Living</b>                       | 1                                                |                    |                                                 |                                                             |
|                                   | <b>Deceased</b>                     | 0.51 (0.30-0.85)                                 | 0.0097             |                                                 |                                                             |
| <b>Recipient size</b>             |                                     |                                                  |                    |                                                 |                                                             |
|                                   | <b>BSA &lt; 0.75 m<sup>2</sup></b>  | 1.55 (0.76-3.18)                                 | 0.2294             |                                                 |                                                             |
|                                   | <b>BSA 0.75 - 1.5 m<sup>2</sup></b> | 1.30 (0.66-2.54)                                 | 0.4467             |                                                 |                                                             |
|                                   | <b>BSA &gt; 1.5 m<sup>2</sup></b>   | 1                                                |                    |                                                 |                                                             |
| <b>Time after transplantation</b> |                                     |                                                  |                    |                                                 |                                                             |
|                                   | <b>Implantation</b>                 | 1                                                |                    | 1                                               |                                                             |
|                                   | <b>6 months</b>                     | 0.81 (0.43-1.52)                                 | 0.5078             | 0.68 (0.34-1.40)                                | 0.3009                                                      |

|                                        |                      |                  |         |                  |         |
|----------------------------------------|----------------------|------------------|---------|------------------|---------|
|                                        | <b>12 months</b>     | 1.25 (0.68-2.30) | 0.472   | 1.15 (0.58-2.28) | 0.6829  |
|                                        | <b>24 months</b>     | 3.03 (1.68-5.46) | 0.0002  | 3.30 (1.77-6.18) | 0.0002  |
| <b>Prior acute rejection episode</b>   |                      |                  |         |                  |         |
|                                        | <b>No</b>            | 1                |         |                  |         |
|                                        | <b>Prior AR</b>      | 1.07 (0.54-2.13) | 0.8403  |                  |         |
| <b>Pristine kidney at implantation</b> |                      |                  |         |                  |         |
|                                        | <b>Yes</b>           | 1                |         | 1                |         |
|                                        | <b>No</b>            | 3.35 (2.03-5.56) | <0.0001 | 3.24 (1.88-5.57) | <0.0001 |
| <b>Donor age</b>                       |                      |                  |         |                  |         |
|                                        | <b>&lt; 25 years</b> | 1                |         | 1                |         |
|                                        | <b>25 - 35 years</b> | 2.50 (1.32-4.73) | 0.005   | 2.52 (1.32-4.81) | 0.0052  |
|                                        | <b>&gt; 35 years</b> | 3.21 (1.65-6.24) | 0.0006  | 2.51 (1.23-5.12) | 0.011   |

\*Analyses were performed using the GENMOD procedure with generalized-estimating-equations (GEE).

|                                   |                                     | Determinants of higher CADI score* |                    |                                                 |                                                             |
|-----------------------------------|-------------------------------------|------------------------------------|--------------------|-------------------------------------------------|-------------------------------------------------------------|
|                                   |                                     | Univariate odds ratio              | Univariate p-value | Multivariate p-value after backward elimination | Multivariate adjusted odds ratio after backward elimination |
| <b>Treatment group</b>            |                                     |                                    |                    |                                                 |                                                             |
|                                   | <b>Steroid-based</b>                | 1                                  |                    |                                                 |                                                             |
|                                   | <b>Steroid-free</b>                 | 0.93 (0.58-1.49)                   | 0.7677             |                                                 |                                                             |
| <b>Recipient sex</b>              |                                     |                                    |                    |                                                 |                                                             |
|                                   | <b>Female</b>                       | 1                                  |                    |                                                 |                                                             |
|                                   | <b>Male</b>                         | 1.28 (0.78-2.10)                   | 0.3218             |                                                 |                                                             |
| <b>Donor sex</b>                  |                                     |                                    |                    |                                                 |                                                             |
|                                   | <b>Female</b>                       | 1                                  |                    |                                                 |                                                             |
|                                   | <b>Male</b>                         | 0.94 (0.59-1.49)                   | 0.7812             |                                                 |                                                             |
| <b>Recipient age</b>              |                                     |                                    |                    |                                                 |                                                             |
|                                   | <b>&lt; 5 years</b>                 | 2.65 (1.70-4.12)                   | <0.0001            |                                                 |                                                             |
|                                   | <b>5 - 12 years</b>                 | 1.15 (0.63-2.08)                   | 0.6505             |                                                 |                                                             |
|                                   | <b>&gt; 12 years</b>                | 1                                  |                    |                                                 |                                                             |
| <b>Donor source</b>               |                                     |                                    |                    |                                                 |                                                             |
|                                   | <b>Living</b>                       | 1                                  |                    |                                                 |                                                             |
|                                   | <b>Deceased</b>                     | 0.59 (0.37-0.94)                   | 0.0269             |                                                 |                                                             |
| <b>Recipient size</b>             |                                     |                                    |                    |                                                 |                                                             |
|                                   | <b>BSA &lt; 0.75 m<sup>2</sup></b>  | 3.36 (1.93-5.85)                   | <0.0001            | 5.44 (2.91-10.1)                                | <0.0001                                                     |
|                                   | <b>BSA 0.75 - 1.5 m<sup>2</sup></b> | 1.55 (0.91-2.65)                   | 0.1102             | 2.07 (1.10-3.89)                                | 0.0236                                                      |
|                                   | <b>BSA &gt; 1.5 m<sup>2</sup></b>   | 1                                  |                    |                                                 |                                                             |
| <b>Time after transplantation</b> |                                     |                                    |                    |                                                 |                                                             |
|                                   | <b>Implantation</b>                 | 1                                  |                    | 1                                               |                                                             |
|                                   | <b>6 months</b>                     | 7.43 (4.24-13.0)                   | <0.0001            | 7.53 (4.20-13.5)                                | <0.0001                                                     |

|                                        |                      |                  |         |                  |         |
|----------------------------------------|----------------------|------------------|---------|------------------|---------|
|                                        | <b>12 months</b>     | 9.78 (5.14-18.6) | <0.0001 | 10.1 (5.01-20.5) | <0.0001 |
|                                        | <b>24 months</b>     | 13.9 (7.01-27.6) | <0.0001 | 14.4 (6.88-29.9) | <0.0001 |
| <b>Prior acute rejection episode</b>   |                      |                  |         |                  |         |
|                                        | <b>No</b>            | 1                |         | 1                |         |
|                                        | <b>Prior AR</b>      | 4.35 (2.68-7.08) | <0.0001 | 2.48 (1.39-4.41) | 0.002   |
| <b>Pristine kidney at implantation</b> |                      |                  |         |                  |         |
|                                        | <b>Yes</b>           | 1                |         |                  |         |
|                                        | <b>No</b>            | 1.99 (1.24-3.20) | 0.0046  |                  |         |
| <b>Donor age</b>                       |                      |                  |         |                  |         |
|                                        | <b>&lt; 25 years</b> | 1                |         | 1                |         |
|                                        | <b>25 - 35 years</b> | 1.60 (0.95-2.69) | 0.075   | 1.63 (0.88-3.04) | 0.1221  |
|                                        | <b>&gt; 35 years</b> | 2.15 (1.19-3.88) | 0.0114  | 3.11 (1.62-5.97) | 0.0007  |

\*Analyses were performed using the GENMOD procedure with generalized-estimating-equations (GEE).
